# Supplementary material for: Reliability and validity of the Croatian version of Consultation and Relational Empathy (CARE) Measure in primary care setting
Source: PubMed Central journal article supplement (PMC4364352; doi:10.3325/cmj.2015.56.50), 2015-02
Supplement: CroatMedJ_56_s003.pdf [file CroatMedJ_56_s003.pdf]

# CARE Patient Feedback Measure for

Please write today's date here:

|   |   |   |   |   |   |   |   |
|---|---|---|---|---|---|---|---|
|   |   | / |   |   | / |   |   |
| D | D |   | M | M |   | Y | Y |

Please rate the following statements about today's consultation.

Please mark the box like this  with a ball point pen. If you change your mind just cross out your old response and make your new choice. Please answer every statement.

| How good was the practitioner at...                                                                                                                                             | Poor                     | Fair                     | Good                     | Very Good                | Excellent                | Does not apply           |
|---------------------------------------------------------------------------------------------------------------------------------------------------------------------------------|--------------------------|--------------------------|--------------------------|--------------------------|--------------------------|--------------------------|
| <b>1) Making you feel at ease</b><br>(introducing him/herself, explaining his/her position, being friendly and warm towards you, treating you with respect; not cold or abrupt) | <input type="checkbox"/> | <input type="checkbox"/> | <input type="checkbox"/> | <input type="checkbox"/> | <input type="checkbox"/> | <input type="checkbox"/> |
| <b>2) Letting you tell your "story"</b><br>(giving you time to fully describe your condition in your own words; not interrupting, rushing or diverting you)                     | <input type="checkbox"/> | <input type="checkbox"/> | <input type="checkbox"/> | <input type="checkbox"/> | <input type="checkbox"/> | <input type="checkbox"/> |
| <b>3) Really listening</b><br>(paying close attention to what you were saying; not looking at the notes or computer as you were talking)                                        | <input type="checkbox"/> | <input type="checkbox"/> | <input type="checkbox"/> | <input type="checkbox"/> | <input type="checkbox"/> | <input type="checkbox"/> |
| <b>4) Being interested in you as a whole person</b><br>(asking/knowing relevant details about your life, your situation; not treating you as "just a number")                   | <input type="checkbox"/> | <input type="checkbox"/> | <input type="checkbox"/> | <input type="checkbox"/> | <input type="checkbox"/> | <input type="checkbox"/> |
| <b>5) Fully understanding your concerns</b><br>(communicating that he/she had accurately understood your concerns and anxieties; not overlooking or dismissing anything)        | <input type="checkbox"/> | <input type="checkbox"/> | <input type="checkbox"/> | <input type="checkbox"/> | <input type="checkbox"/> | <input type="checkbox"/> |
| <b>6) Showing care and compassion</b><br>(seeming genuinely concerned, connecting with you on a human level; not being indifferent or "detached")                               | <input type="checkbox"/> | <input type="checkbox"/> | <input type="checkbox"/> | <input type="checkbox"/> | <input type="checkbox"/> | <input type="checkbox"/> |
| <b>7) Being positive</b><br>(having a positive approach and a positive attitude; being honest but not negative about your problems)                                             | <input type="checkbox"/> | <input type="checkbox"/> | <input type="checkbox"/> | <input type="checkbox"/> | <input type="checkbox"/> | <input type="checkbox"/> |
| <b>8) Explaining things clearly</b><br>(fully answering your questions; explaining clearly, giving you adequate information; not being vague)                                   | <input type="checkbox"/> | <input type="checkbox"/> | <input type="checkbox"/> | <input type="checkbox"/> | <input type="checkbox"/> | <input type="checkbox"/> |
| <b>9) Helping you to take control</b><br>(exploring with you what you can do to improve your health yourself; encouraging rather than "lecturing" you)                          | <input type="checkbox"/> | <input type="checkbox"/> | <input type="checkbox"/> | <input type="checkbox"/> | <input type="checkbox"/> | <input type="checkbox"/> |
| <b>10) Making a plan of action with you</b><br>(discussing the options, involving you in decisions as much as you want to be involved; not ignoring your views)                 | <input type="checkbox"/> | <input type="checkbox"/> | <input type="checkbox"/> | <input type="checkbox"/> | <input type="checkbox"/> | <input type="checkbox"/> |

**Comments:** If you would like to add further comments on this consultation, please do so here.

Dob \_\_\_\_\_

Spol M Ž

Je li ovo Vaš stalni liječnik DA NE

Koliko ste dugo kod ovog liječnika/ice <3 mjeseca 3-6 mjeseci >6 mjeseci

---

### Koliko je Vaš liječnik/ica tijekom pregleda uspio u sljedećem:

- Osjećao/la sam se ugodno** (bio/la je prijateljski raspoložen/a, ponašao/la se s poštovanjem, nije bio/la hladan ili me prekidao/la)  
loše, prihvatljivo, dobro, jako dobro, izvrsno      Nevažno \_\_
- Dozvolio/la je da ja 'ispričam priču'** (dajući mi vremena da u potpunosti opišem svoju bolest vlastitim riječima, ne prekidajući me ili preusmjeravajući me)  
loše, prihvatljivo, dobro, jako dobro, izvrsno      Nevažno \_\_
- Zaista je slušao/la** (poklanjajući punu pažnju onome što govorim, ne gledajući u zabilješke ili računalo dok govorim)  
loše, prihvatljivo, dobro, jako dobro, izvrsno      Nevažno \_\_
- Bio/la je zainteresiran/a za mene kao potpunu osobu** (pitajući ili poznavajući značajne detalje mog života, situacije, ne tretirajući me 'samo kao broj')  
loše, prihvatljivo, dobro, jako dobro, izvrsno      Nevažno \_\_
- U cijelosti je shvatio/la moju zabrinutost** (pokazujući da je razumio/la zabrinutost, ne propuštajući ili zanemarujući ništa)  
loše, prihvatljivo, dobro, jako dobro, izvrsno      Nevažno \_\_
- Pokazao/la je brigu i suosjećanje** (izgledao/la je iskreno zainteresiran i povezan samnom na ljudskoj razini, a ne kao da je indiferentan ili odsutan)  
loše, prihvatljivo, dobro, jako dobro, izvrsno      Nevažno \_\_
- Bio/la je pozitivan, optimističan/a** (imao/la je pozitivna stav i pristup, iskren ali ne negativan)  
loše, prihvatljivo, dobro, jako dobro, izvrsno      Nevažno \_\_
- Objasnio je sve vrlo jasno** (u potpunosti odgovorio na moja pitanja, dajući adekvatne informacije, nije bio/la nejasan/a)  
loše, prihvatljivo, dobro, jako dobro, izvrsno      Nevažno \_\_
- Pomogao mi je preuzeti aktivnu ulogu u brizi o vlastitom zdravlju** (istražujući što mogu sam/a učiniti da poboljšam svoje zdravlje, ohrabrujući me bez 'govora s visoka')  
loše, prihvatljivo, dobro, jako dobro, izvrsno      Nevažno \_\_

**10. Zajedno smo napravili plan 'aktivnosti' (raspravljajući o različitim mogućnosti, uključio/la me u odluke koliko god je bilo moguće, ne ignorirajući moje stavove)**  
**loše, prihvatljivo, dobro, jako dobro, izvrsno**      **Nevažno\_\_**

Prilog 3.

## PEI upitnik

Molimo odgovorite na svih šest pitanja (tvrdnji) na način da odgovarajuću kućicu u tablici označite križićem

Kao rezultat Vašeg današnjeg posjeta liječniku, osjećate li da ste...

|                                           | Puno bolje | Bolje | Jednako ili lošije |
|-------------------------------------------|------------|-------|--------------------|
| Sposoban nositi se sa životom             |            |       |                    |
| Sposoban razumijeti svoju bolest          |            |       |                    |
| Sposoban nositi se sa svojom bolešću      |            |       |                    |
| Sposoban održavati sebe zdravim           |            |       |                    |
|                                           | Puno više  | Više  | Jednako ili manje  |
| Čvrsto uvjeren / siguran u svoje zdravlje |            |       |                    |
| Sposoban sam sebi pomoći                  |            |       |                    |

---

Biste li ovog liječnika preporučili prijateljima ili rodbini?                      DA      NE

Kako ste sveukupno zadovoljni ovim liječnikom  
Vrlo nezadovoljan    nezadovoljan    srednje    zadovoljan    vrlo zadovoljan

Kako biste procijenili svoja mjesečna primanja?  
ispodprosječna    prosječna    iznadprosječan

---

Sestra mjeri duljinu konzultacije:    <5min    5-10min    >10 min
